# Supplementary material
Source: PubMed Central journal article supplement (PMC5535761)
Supplement: NIHMS873041-supplement-Supplement_Data.pdf [file NIHMS873041-supplement-Supplement_Data.pdf]

Supplementary Materials for  
**NAD<sup>+</sup> repletion improves muscle function in muscular dystrophy and counters global PARylation**

Dongryeol Ryu, Hongbo Zhang, Eduardo R. Ropelle, Vincenzo Sorrentino, Davi A. G. Mázala, Laurent Mouchiroud, Philip L. Marshall, Matthew D. Campbell, Amir Safi Ali, Gary M. Knowels, Stéphanie Bellemin, Shama R. Iyer, Xu Wang, Karim Gariani, Anthony A. Sauve, Carles Cantó, Kevin E. Conley, Ludivine Walter, Richard M. Lovering, Eva R. Chin, Bernard J. Jasmin, David J. Marcinek, Keir J. Menzies,\* Johan Auwerx\*

\*Corresponding author. Email: admin.auwerx@epfl.ch (J.A.); kmenzies@uottawa.ca (K.J.M.)

Published 19 October 2016, *Sci. Transl. Med.* **8**, 361ra139 (2016)  
DOI: 10.1126/scitranslmed.aaf5504

**This PDF file includes:**

Materials and Methods

Fig. S1. Enrichment of mitochondrial-related transcripts with *Nampt* expression in genetically diverse BXD mice.

Fig. S2. Expression of NAD<sup>+</sup>-related transcripts in human muscle and PARP protein expression and PARylation in mouse models of muscular dystrophy.

Fig. S3. NR enhances mitochondrial content in C2C12 myotubes and improves function in *dys-1;hll-1* double-mutant *C. elegans*.

Fig. S4. Improvements in the phenotype of NR-treated *mdx* mice.

Fig. S5. Average intensity of nuclei immunohistochemically stained with an anti-PAR antibody.

Fig. S6. Increases in the minimal Feret's diameter of *mdx/Utr<sup>-/-</sup>* mouse muscle fibers treated with NR.

Table S1. Primer sets for qRT-PCR analyses.

References (56–60)

Detailed conditions and analysis of MRS data:

*Peak simulations:* Solutions emulating in vivo conditions were prepared with  $\text{NAD}^+$  and  $\text{NADP}^+$  using binding constants taken from the USA National Institute of Standards and Technology (NIST) Critically Selected Stability Constants of Metal Complexes Database (see (56)). All solutions contained (in mmol/L): EGTA 15, MOPS 80, free  $\text{Mg}^{2+}$  1,  $\text{Na}^+$  83 and  $\text{K}^+$  52. The following were varied in individual solutions: ATP, ADP,  $\text{P}_i$ , Creatine Phosphate (PCr), ADP,  $\text{NAD}^+$ , NADH,  $\text{NADP}^+$ , or UDP-Glucose. The ionic strength was maintained at 0.175M, pH = 7.0 (36°C) in all solutions. High-resolution MR spectra of solutions in an NMR tube were taken at 4.7T (sweep width=10,000 Hz, 16K complex points, 128 FIDs, 5 sec delay between pulses). The Spin Simulation feature of the Mnova software provided the  $\text{NAD}^+$  (-10.74 ppm and J coupling, 20.03 Hz) and  $\text{NADP}^+$  (-10.83 ppm and J coupling, 18.03 Hz) resonances at each field based on the spin parameters and chemical shifts at 4.7T as described (57).  
*Metabolite Concentrations:* Mice were euthanized within 20 minutes of the end of the MRS experiment. Gastrocnemius muscles were removed and frozen from anesthetized mice within 20 minutes of the end of the MRS experiments. Concentration of ATP was measured in the gastrocnemius muscle by HPLC (Waters, Milford, MA) using a protocol described in detail elsewhere (58).

*Analyses of in vivo ATP Fluxes:*  $^{31}\text{P}$  MR spectra were exponentially multiplied (40 Hz at 14T), fourier transformed, and manually phase corrected using Bruker TopSpin (14T) software. Fully relaxed and dynamic phase spectra were then analyzed with custom written MATLAB software (Mathworks, Natick, MA).

The method used for analyzing MR spectra is described in detail elsewhere (51). Peak areas relative to gamma a-ATP peak area from fully relaxed spectra were used to calculate the resting inorganic phosphate  $\text{P}_i/\text{ATP}$  and  $\text{PCr}/\text{ATP}$  ratios. Three consecutive dynamic spectra were summed to improve signal-to-noise ratio before using the Fit-to-Standard algorithm (59) to determine PCr and  $\text{P}_i$  peak magnitudes throughout dynamic acquisition, relative to rest. Absolute PCr and  $\text{P}_i$  concentrations were calculated using the ATP concentration measured by HPLC. The chemical shift between the  $\text{P}_i$  and PCr peaks was used to calculate the cellular pH during the dynamic phase (60). Experiments where end of ischemia pH fell below 6.8 were excluded from analyses of ATPmax.

*$\text{NAD}^+$  in vivo:* The NAD(P) region (-10.4 to -11.3 ppm) was extracted from the fully relaxed spectra by fitting a Lorentzian line shape to the a-ATP peak. The  $\text{NAD}^+$  and  $\text{NADP}^+$  peaks were estimated by a least squares fit of the simulated peaks to the -10.4 to -11.0 ppm portion of the extracted region.

## Supplementary Figures

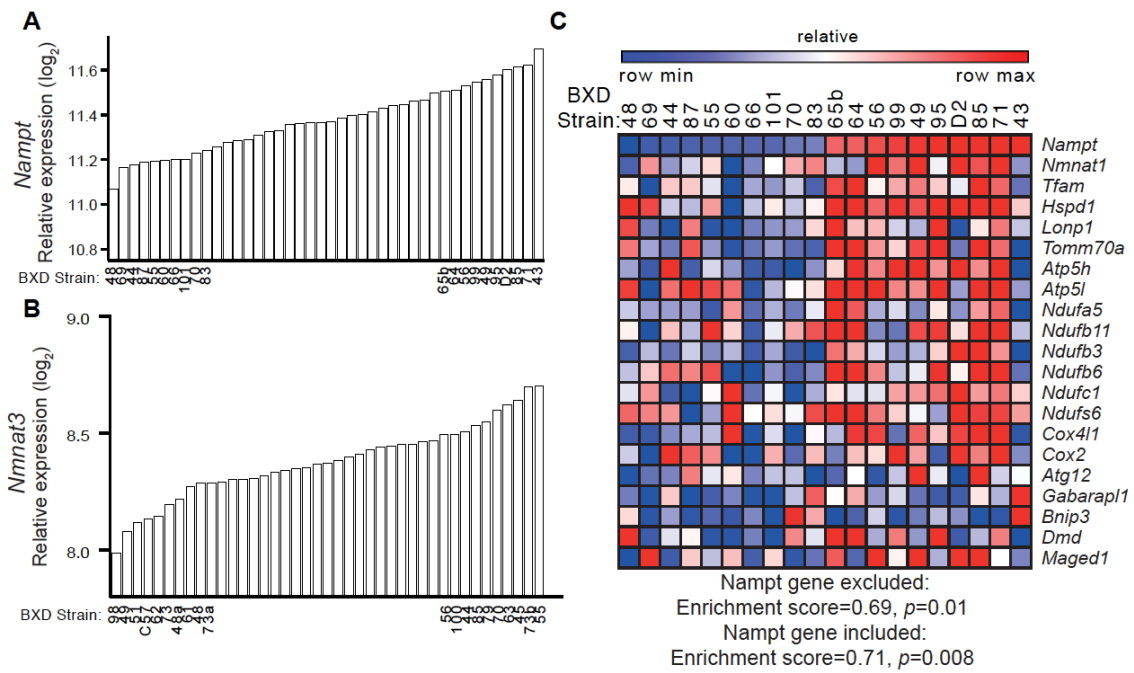

**Fig. S1. Enrichment of mitochondrial-related transcripts with *Nampt* expression in genetically diverse BXD mice.** Expression of (A) *Nampt* and (B) *Nmnat3* in the quadriceps of 42 strains of the BXD mouse genetic reference population. Each bar represents mRNA from a pool of 5 animals per strain. Extreme strains are labeled. Custom gene set analysis showing enrichment of mitochondrial-related transcripts with (C) *Nampt* in data from strains with the 10 highest and 10 lowest transcript levels from 42 strains of the BXDs (20). Using gene set enrichment analysis we found a positive correlation to *Nampt* transcript expression with an enrichment score=0.69 and  $P=0.01$ , with the *Nampt* gene excluded from the analysis.

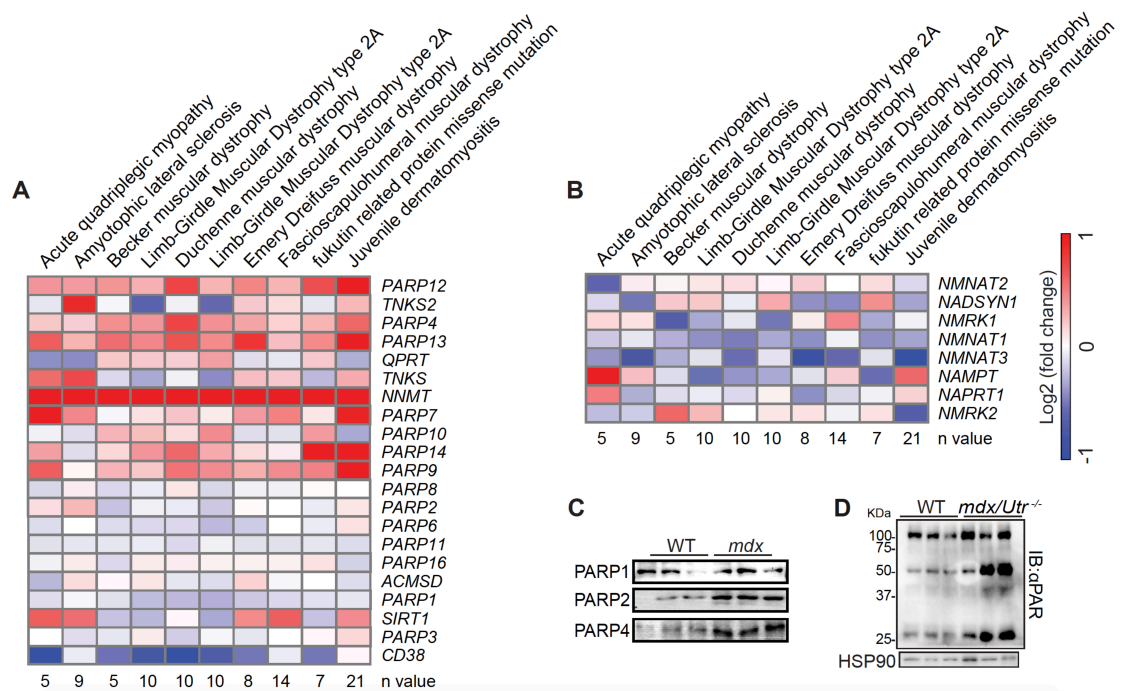

**Fig. S2. Expression of NAD<sup>+</sup> related transcripts in human muscle and PARP protein expression and PARylation in mouse models of muscular dystrophy.** The expression of transcripts related to NAD<sup>+</sup> (A) consumption or (B) biosynthesis exhibit an enrichment signature of *PARP* genes and the *NNMT* gene that is consistent across skeletal muscle datasets (24, 25) from a variety of muscular dystrophies and in patients with (neuro)-muscular diseases. All results for a given condition are averaged from a group of datasets and expressed in relationship to the average of the control patient values (n value for each disease is indicated at the bottom of the heatmap; n=18 for the control group). (C) PARP1 (WT=1.00±0.42, *mdx*=1.41±0.36), PARP2 (WT=1.00±0.56, *mdx*=3.54±0.24, *P*=0.014) and PARP4 (WT=1.00±0.28, *mdx*=2.29±0.02, *P*=0.036) proteins were induced in *mdx* mice. HSP90 (Fig. 4D) was used as loading control. (D) Total PARylation content (WT=1.00±0.41, *mdx/Utr*<sup>-/-</sup> = 2.09±0.71) was increased in *mdx/Utr*<sup>-/-</sup> gastrocnemius muscle.

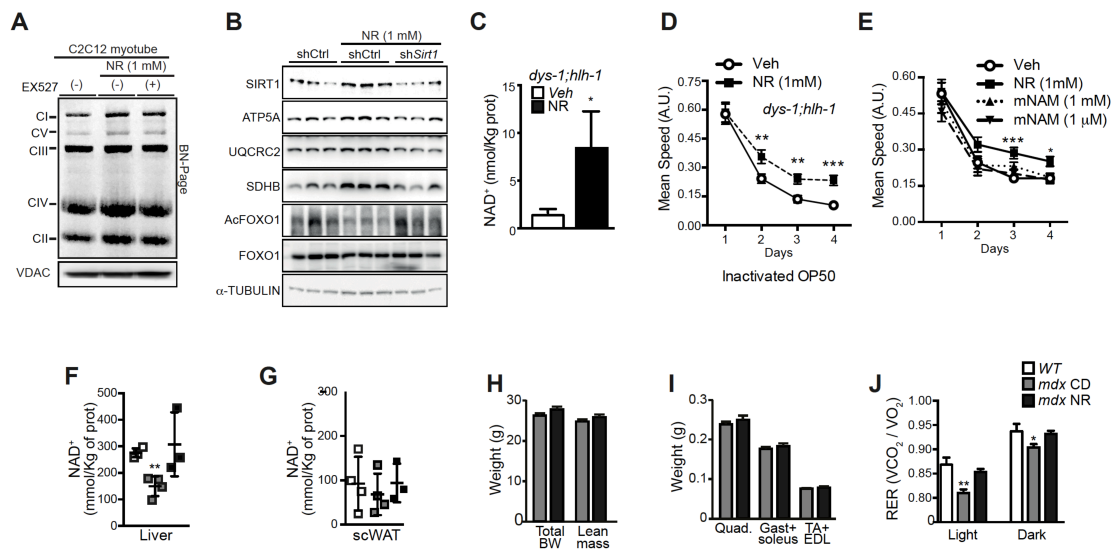

**Fig. S3. NR enhances mitochondrial content in C2C12 myotubes and improves function in *dys-1;hlh-1* double mutant *C. elegans*.** C2C12 myotubes were treated with 0.5 to 1 mM NR. 12 hrs of NR induces (A) mitochondrial biogenesis in the presence or absence of EX527, as demonstrated by Blue-native PAGE of mitochondrial complexes from isolated mitochondria. (B) *shSirt1* adenovirus infection of myotubes attenuated increases in mitochondrial proteins (ATP5A (*shCtrl*=1.00±0.17, *shCtrl*+NR=1.41±0.16, *shSirt1*+NR=1.17±0.42), UQCRC2 (*shCtrl*=1.00±0.06, *shCtrl*+NR=1.13±0.02, *shSirt1*+NR=0.45±0.10, *shCtrl*+NR vs. *shSirt1*+NR *P*=0.002), SDHB (*shCtrl*=1.00±0.34, *shCtrl*+NR=2.16±0.02, *shSirt1*+NR=1.42±0.72, *shCtrl* vs. *shCtrl*+NR *P*=0.028)) and reductions in FOXO1 acetylation (*shCtrl*=1.00±0.21, *shCtrl*+NR=0.22±0.07, *shSirt1*+NR=1.36±0.23, *shCtrl* vs. *shCtrl*+NR *P*=0.023, *shCtrl*+NR vs. *shSirt1*+NR *P*=0.009) following NR treatment. (C) NAD<sup>+</sup> levels are significantly elevated by 2 days of NR treatment in *dys-1;hlh-1* mutant worms (n=4, 1000 worms per experiment). Improvements in *dys-1;hlh-1* mutant worm fitness on days 1-4 of adulthood in worms fed (D) a diet of heat inactivated OP50 with NR (1mM), or (E) a live OP50 diet with NR (1mM) or mNAM (1mM or 1μM), as measured by examining worm motility using the worm tracker (n=3, 60 worms per experiment). *mdx* mice treated for 12 weeks with NR demonstrated (F) restored NAD<sup>+</sup> levels in liver (n=4 for WT and *mdx* CD, n=3 for *mdx* NR) yet (G) no changes in NAD<sup>+</sup> in subcutaneous WAT (n=4 for WT and *mdx* CD, n=3 for *mdx* NR). NR treated *mdx* mice also showed no significant changes in (H) total body weight, lean mass (n=6) or (I) wet weights of quadriceps, gastrocnemius and soleus or tibialis anterior and extensor digitorum longus muscles (n=5). (J) Energy expenditure was evaluated through calculation of the respiratory exchange ratio (RER) over a 24 hr period for *mdx* mice with or without NR treatment compared to WT mice (n=6).

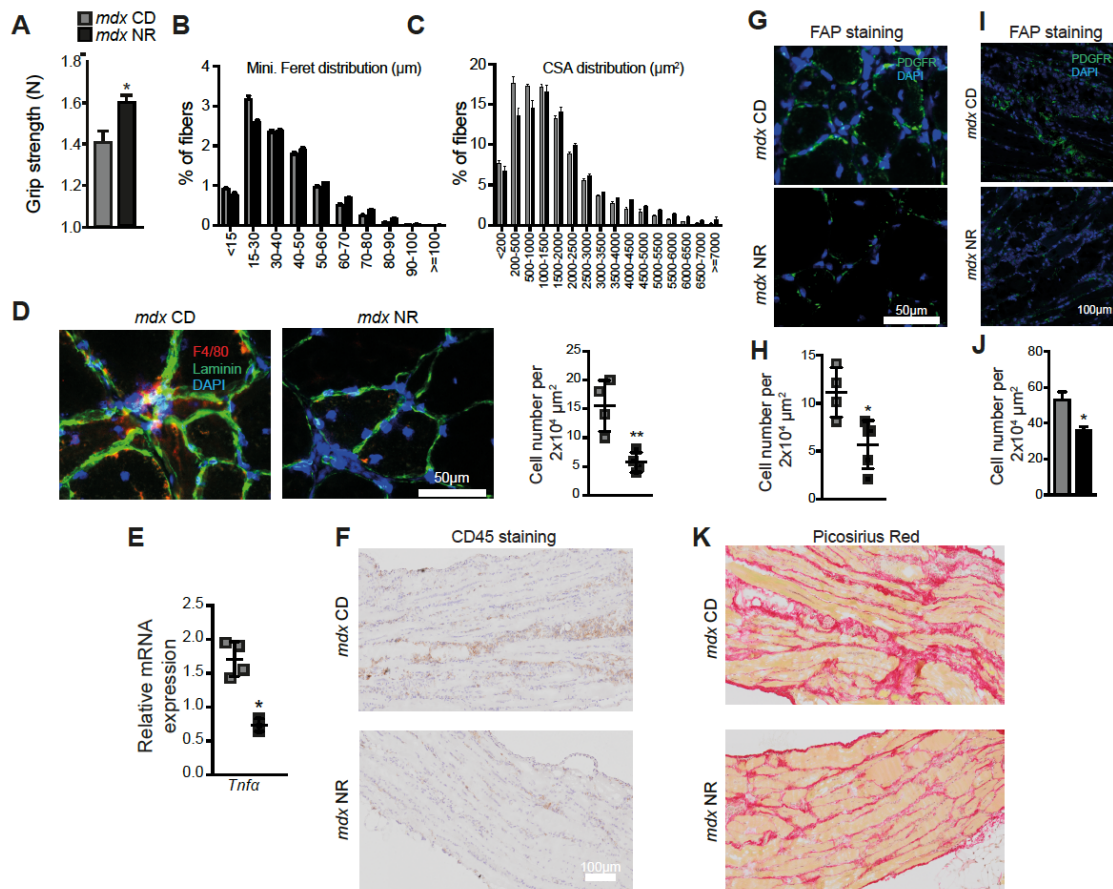

**Fig. S4. Improvements in the phenotype of NR-treated *mdx* mice.** *mdx* mice treated for 12 weeks with NR exhibited (A) increased limb grip strength (Newtons of force,  $n=6$ ). Analysis of the (B) minimal Feret's diameter (in  $\mu\text{m}$ ) and the (C) cross-sectional area (in  $\mu\text{m}^2$ ) of *mdx* tibialis anterior muscle fibers show an increase in fiber size with NR treatment (8 weeks of NR treatment,  $n=5$ ). Quantification of images was performed with ImageJ software. NR-treated *mdx* mice also demonstrated (D) reduced macrophage content, quantified by counting F40/80-positive stained cells in *mdx* tibialis anterior muscles ( $n=4$ ). Quantification of images was performed with ImageJ software. (E) mRNA levels of *tnfa*, a mediator of inflammation in *mdx* mice, was attenuated with NR treatment in gastrocnemius muscle ( $n=3$ ). (F) CD45 positive cells were reduced in the longitudinal-sections of NR-treated *mdx* mouse diaphragms. PDGFR positive cells were reduced following NR in both (G) transverse-sections of TA muscle and (H) quantified transverse-sections of diaphragms in *mdx* mice. Quantification of images was performed with ImageJ software ( $n=4$ , *mdx*;  $n=5$ , *mdx* NR). (I) Reduced PDGFR staining of longitudinal-sections of the diaphragm (J) quantified using ImageJ software ( $n=6$ , *mdx*;  $n=5$ , *mdx* NR). (K) Fibrosis was reduced in longitudinal sections of the diaphragm in *mdx* mice given an NR supplemented diet, as seen with less picosirius red staining.

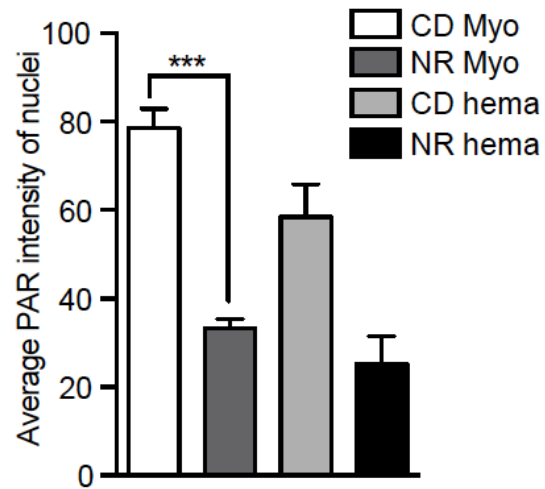

**Fig. S5. Average intensity of nuclei immunohistochemically stained with anti-PAR antibody.** Skeletal muscle nuclei stained from *mdx* mice with anti-PAR are differentiated from the inflammatory cell fraction using an anti-CD45 counterstain (n=3, CD; n=3, NR). Quantification of images was performed with ImageJ software.

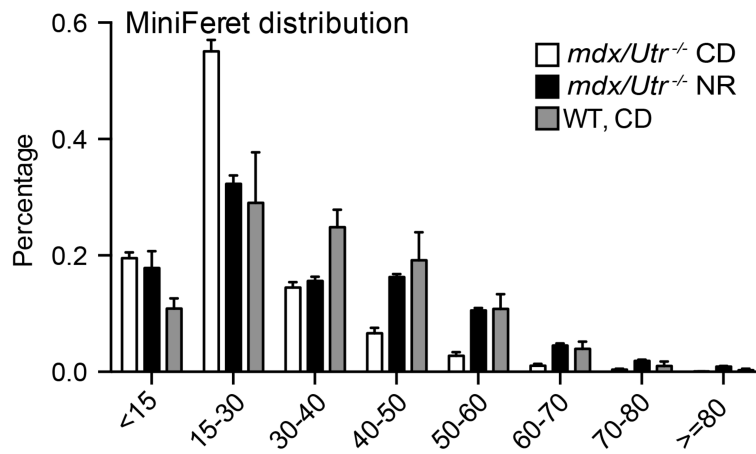

**Fig. S6. Increases in the minimal Feret's diameter of *mdx/Utr*<sup>-/-</sup> mouse muscle fibers treated with NR.** 10-week-old *mdx/Utr*<sup>-/-</sup> mice received a dietary supplement with NR (400 mg/kg/day) for 8 weeks. Images stained with Dapi and laminin were used to quantify increases in the distribution of minimal Feret's diameter (in μm) of fibers in tibialis anterior muscles of NR treated *mdx/Utr*<sup>-/-</sup> mice (n=3, *mdx/Utr*<sup>-/-</sup>; n=3, *mdx/Utr*<sup>-/-</sup> NR; n=3, WT, CD). Quantification of images was performed with ImageJ software.



**Table S1: Primer sets for qRT-PCR analyses**

| Gene          | Description                                                                                 | Forward Primer        | Reverse Primer          |
|---------------|---------------------------------------------------------------------------------------------|-----------------------|-------------------------|
| <b>36b4</b>   | Ribosomal protein, large, P0                                                                | AGATTCGGGATATGCTGTTGG | AAAGCCTGGAAGAAGGAGGTC   |
| <b>B2m</b>    | Beta-2 microglobulin                                                                        | TTCTGGTGCTTGTCTCACTG  | TATGTTCCGGCTTCCCATTCT   |
| <b>Gapdh</b>  | Glyceraldehyde-3-phosphate dehydrogenase                                                    | TGTGTCCGTCGTGGATCTGA  | CCTGCTTACCACCTTCTTGAT   |
| <b>Tnfa</b>   | Tumor necrosis factor                                                                       | GTAGCCCACGTCGTAGCAAAC | GCAGACTTACTGACCAGCTCAGA |
| <b>Il13</b>   | Interleukin 13                                                                              | CACACTCCATACCATGCTGC  | TGTGTCTCTCCCTCTGACCC    |
| <b>Il4</b>    | Interleukin 4                                                                               | ACAGGAGAAGGGACGCCAT   | GAAGCCCTACAGACGAGCTCA   |
| <b>Ndufa2</b> | NADH dehydrogenase (ubiquinone) 1 alpha subcomplex, 2                                       | GCACACATTTCCCCACACTG  | CCAACCTGCCCATTTCTGAT    |
| <b>Sdhb</b>   | Succinate dehydrogenase complex, subunit B                                                  | GGACCTATGGTGTGGATGC   | GTGTGCACGCCAGAGTATTG    |
| <b>ATP5g1</b> | ATP synthase, H <sup>+</sup> transporting, mitochondrial F0 complex, subunit C1 (subunit 9) | GCTGCTTGAGAGATGGTTC   | AGTTGGTGTGGCTGGATCA     |
| <b>Nmnat1</b> | Nicotinamide nucleotide adenylyltransferase 1                                               | TGTGCCCAAGGTGAAATTGCT | CCACGATTTGCGTGATGTCC    |
| <b>Uqcrc1</b> | Ubiquinol-cytochrome c reductase core protein 1                                             | AGACCCAGGTCAGCATCTTG  | GCCGATTCTTTGTTCCCTTGA   |
| <b>Sirt1</b>  | Sirtuin 1                                                                                   | GCTGACGACTTCGACGACG   | TCGGTCAACAGGAGGTTGTCT   |
